# Supplementary material for: Magnetically levitated mesenchymal stem cell spheroids cultured with a collagen gel maintain phenotype and quiescence
Source: PubMed Central journal article supplement (PMC5460809; doi:10.1177/2041731417704428), 2017-04-24
Supplement: Supplementary_Table_1.pdf [file Supplementary_Table_1.pdf]

Supplementary Table 1. Fluidigm primers designed for human genes.

(\*Primers used as housekeeping genes).

| Primer | Sequence (5' to 3')                                                   |
|--------|-----------------------------------------------------------------------|
| c-myc  | Forward GACTCTGAGGAGGAACAAGA<br>Reverse TTGGCAGCAGGATAGTCCTT          |
| CCNA1  | Forward TCAGTACCTTAGGGAAGCTGAAA<br>Reverse CCAGTCCACCAGAATCGTG        |
| CCNA2  | Forward CCATACCTCAAGTATTTGCCATC<br>Reverse TCCAGTCTTTCGTATTAATGATTCAG |
| CCNB1  | Forward ACATGGTGCACCTTTCCTCCT<br>Reverse AGGTAATGTTGTAGAGTTGGTGTCC    |
| CCNB2  | Forward GAAGATTGGGAGAACCCTCA<br>Reverse TGTGGGTTTATGGACTGCAA          |
| CCNC   | Forward TTTGCTGAGCTTTCTGTGGA<br>Reverse AATGGTTGCCATCTCTTTTCTC        |
| CCND1  | Forward TGCATCTACACCGACA ACTCC<br>Reverse CGGATGATCTGTTTGTCTCCG       |

|       |                                                                      |
|-------|----------------------------------------------------------------------|
| CCND2 | Forward TACACCGACAACCTCCATCAAGC<br>Reverse ATGTGCTCAATGAAGTCATGAGG   |
| CCND3 | Forward TACACCGACCACGCTGTCT<br>Reverse GAAGGCCAGGAAATCATGTG          |
| CCNE1 | Forward ACAGCTTGGATTTGCTGGAC<br>Reverse TCTGCTTCTTACCGCTCTGTG        |
| CCNE2 | Forward GCCATTGATTCATTAGAGTTCCA<br>Reverse TGAAATACTGTCCCCTCCAAAC    |
| CCNT1 | Forward GAACATGTCATCAAGGTAGCACA<br>Reverse AATGACCAGATCTTGAACCTTGTTG |
| CDC2  | Forward TGAAATGTTTCATGGGGGAAC<br>Reverse AAAAAGCTCCTGATGCCTTG        |
| CDK1  | Forward AACTACAGGTCAAGTGGTAGCC<br>Reverse GGAATCCTGCATAAGCACATCC     |
| CDK2  | Forward CCTCCTGGGCTGCAAATA<br>Reverse CAGAATCTCCAGGGAATAGGG          |
| CDK4  | Forward AGTGTTGGCTGTATCTTTGCAG                                       |

|                 |                                                                   |
|-----------------|-------------------------------------------------------------------|
|                 | Reverse ATCTCGAGGCCAGTCATCC                                       |
| <b>CDK5</b>     | Forward TCTTTTCCCGGCAATGAT<br>Reverse TCTGGCAGCTTGGTCATAGA        |
| <b>CDK6</b>     | Forward GAACTAGGCAAAGACCTACTTCTGA<br>Reverse GGTGGGAATCCAGGTTTTCT |
| <b>CDKN1A</b>   | Forward GTGGACCTGGAGACTCTCAG<br>Reverse CCTCTTGGAGAAGATCAGCCG     |
| <b>CDKN1B</b>   | Forward GGCTAACTCTGAGGACACGC<br>Reverse TGAGTAGAAGAATCGTCGGTGC    |
| <b>B-Actin*</b> | Forward GTGGGCCGCCCTAGGCACCAG<br>Reverse CACTTTGATGTCACGCACGATTTC |
| <b>ENOX-2*</b>  | Forward GAGCTGGAGGGAACCTGATTT<br>Reverse CACTGGCACTACCAAACCTGCA   |
| <b>TWY-1*</b>   | Forward ATTGTCATCAAGACGCAGGGC<br>Reverse GTTGCGAATCCCTTCGCTGTT    |
| <b>CYCR*</b>    | Forward ACTGCGGGAAGGTCTCTACTT<br>Reverse GGGTGCCATCGTCAAACCTCTA   |

|                |                                                                |
|----------------|----------------------------------------------------------------|
| <b>UBE2D2*</b> | Forward CCATGGCTCTGAAGAGAATCC<br>Reverse GATAGGGACTGTCATTTGGCC |
| <b>RNF20*</b>  | Forward GGTGTCTCTTCAACGGAGGAA<br>Reverse TAGTGAGGCATCATCAGTGGC |
| <b>B2M*</b>    | Forward TTGTCTTTCAGCAAGGACTGG<br>Reverse ATGCGGCATCTTCAAACCTCC |
| <b>GAPDH*</b>  | Forward TCAAGGCTGAGAACGGGAA<br>Reverse TGGGTGGCAGTGATGGCA      |
